# Supplementary material
Source: PubMed Central journal article supplement (PMC4859716)
Supplement: JVI.00189-16_zjv999091632so1.pdf [file JVI.00189-16_zjv999091632so1.pdf]

Supplemental Table 1. Schematic representation of CD69 3' UTR depicting predicted miRNA binding sites. Alignment of CD69 mRNA sequence with specific miRNAs: top strand- CD69 mRNA; bottom strand-miRNA.

| miRNA ID                      | GenBank Access No | Site Conservation                           | Binding site position | Target Site sequence                                                                          | Prediction algorithm           |
|-------------------------------|-------------------|---------------------------------------------|-----------------------|-----------------------------------------------------------------------------------------------|--------------------------------|
| miR-15a                       | NM_001781         | Human/Chimp/Macaque/<br>Orangutan/Mouse     | 65-71                 | 5' ...AUCUGUGUCAUUGGAUGCUGCUC...<br>         <br>3' AAGUUUUGUACUUAAACGACGAC                   | TargetScan (Lewis et al. 2005) |
| miR-15b                       | NM_001781         | Human/Chimp/Macaque/<br>Orangutan/Mouse     | 65-71                 | 5' ...AUCUGUGUCAUUGGAUGCUGCUC...<br>         <br>3' ACAUUUUGGUACUACACGACGAU                   | TargetScan (Lewis et al. 2005) |
| miR-20a                       | NM_001781         | Human/Chimp/Macaque/<br>Orangutan/Mouse     | 284-291               | 5' ...AUGAAACCUUUGGAUGCACUUUA...<br>         <br>3' AUGGACGUGAUUUCGUGAAAU                     | TargetScan (Lewis et al. 2005) |
| miR-20b                       | NM_001781         | Human/Chimp/Macaque/<br>Orangutan/Mouse     | 284-291               | 5' ...AUGAAACCUUUGGAUGCACUUUA...<br>         <br>3' GAUGGACGUGAUACUCGUGAAAC                   | TargetScan (Lewis et al. 2005) |
| miR-106b                      | NM_001781         | Human/Chimp/Macaque/<br>Orangutan/Mouse     | 284-291               | 5' ...AUGAAACCUUUGGAUGCACUUUA...<br>         <br>3' UAGACGUGACAGUCGUGAAAU                     | TargetScan (Lewis et al. 2005) |
| miR-21                        | NM_001781         | Human/Chimp/Macaque                         | 953-959               | 5' ...GUGUUCAGUACAAUUUAAGCUG...<br>                        <br>3' AGUUGUAGUCAGAC-----UAUUCGAU | TargetScan (Lewis et al. 2005) |
| miR-301a                      | NM_001781         | Human/Chimp/Macaque/<br>Orangutan/Mouse     | 384-391               | 5' ...GAGCGCUUCAUGCCUUUGCACUA...<br>         <br>3' CGAAACUGUUAUGAUAAACGUGAC                  | TargetScan (Lewis et al. 2005) |
| miR-181a                      | NM_001781         | Human/Chimp/Macaque/<br>Mouse/Rat           | 423-430               | 5' ...GUUGGUACUAGAUACUGAAUGUA...<br>         <br>3' UGAGUGGCUGUCGCAACUUAACA                   | TargetScan (Lewis et al. 2005) |
| miR-92a<br>(site 1)           | NM_001781         | Human/Chimp/Macaque                         | 761-768               | 5' ...AAAGUGUUGGAAAUGUGCAAUA...<br>         <br>3' UGUCCGGCCCGUUCACGUUAU                      | TargetScan (Lewis et al. 2005) |
| miR-92a<br>(site 2)           | NM_001781         | Human/Chimp/Macaque/<br>Rat                 | 872-879               | 5' ...AAUCAAUUCUUAUUAUGUGCAAUA...<br>         <br>3' UGUCCGGCCCGUUCACGUUAU                    | TargetScan (Lewis et al. 2005) |
| miR-92a<br>(site 3)           | NM_001781         | Human/Chimp/Macaque/<br>Rat                 | 909-916               | 5' ...UUAAAAUUAUUUUUUAUGUGCAAUA...<br>         <br>3' UGUCCGGCCCGUUCACGUUAU                   | TargetScan (Lewis et al. 2005) |
| miR-142-5p<br>(Proximal site) | NM_001781         | Human/Chimp/Macaque/<br>Orangutan/Mouse/Rat | 281-288               | 5' ...GCAACCUUUGGAUGCACUUUAUA...<br>         <br>3' UCAUCACGAAGAUGAAAUAC                      | TargetScan (Lewis et al. 2005) |
| miR-142-5p<br>(distal site)   | NM_001781         | Human/Chimp/Macaque                         | 666-672               | 5' ...UACAUUUUCUUUGC-CUUUAUA...<br>                        <br>3' UCAUCACGAAGAUGAAAUAC        | TargetScan (Lewis et al. 2005) |

Supplemental Table 2. Schematic representation of IRAK1 3' UTR depicting predicted miRNA binding sites. Alignment of IRAK1 mRNA sequence with specific miRNAs: top strand- IRAK1 mRNA; bottom strand-miRNA.

| miRNA ID         | GenBank Access Number | Site Conservation                           | Binding sites on 3' UTR | Target Site sequence                                                           | Prediction algorithm           |
|------------------|-----------------------|---------------------------------------------|-------------------------|--------------------------------------------------------------------------------|--------------------------------|
| miR-150 (site 1) | NM_001025242          | Human/Chimp/Macaque/                        | 247-253                 | 5' ...GGAGGCGUGCGCAUGUUGGGAGG...<br>         <br>3'     GUGACCAUGUUCCCAACCCUCU | TargetScan (Lewis et al. 2005) |
| miR-150 (site 2) | NM_001025242          | Human/Chimp/Macaque/                        | 505-511                 | 5' ...UGUAAUCCAGCACUUUGGGAGG...<br>         <br>3'     GUGACCAUGUUCCCAACCCUCU  | TargetScan (Lewis et al. 2005) |
| miR-150 (site 3) | NM_001025242          | Human/Chimp/Macaque/                        | 664-671                 | 5' ...UGUGGUCCAGCUACUUGGGAGG...<br>         <br>3'     GUGACCAUGUUCCCAACCCUCU  | TargetScan (Lewis et al. 2005) |
| miR-150 (site 4) | NM_001025242          | Human/Chimp/Macaque/                        | 1088-1094               | 5' ...GAGGAUCAUUUAUGCUUGGGAGA...<br>         <br>3'     GUGACCAUGUUCCCAACCCUCU | TargetScan (Lewis et al. 2005) |
| miR-142-3p       | NM_001025242          | Human/Chimp/Macaque/<br>Orangutan/Mouse/Rat | 1257-1264               | 5' ...GCUCAGCCGUGAGUCACACUACA...<br>         <br>3' AGGUUUUCAUCCUUUGUGAUGU     | TargetScan (Lewis et al. 2005) |

Supplemental Figure 1. Similar to SIV-infected macaques, miR-150 expression is significantly downregulated in colonic LPL of SIV-uninfected macaques with diarrhea and colitis suggesting that its downregulation is due to immune activation and not a consequence of CD4<sup>+</sup> T cell depletion as these animals have moderate to severe colitis and do not have CD4<sup>+</sup> T cell depletion. Data was normalized to snoU6. The error bars represent standard error of mean fold change within each group.

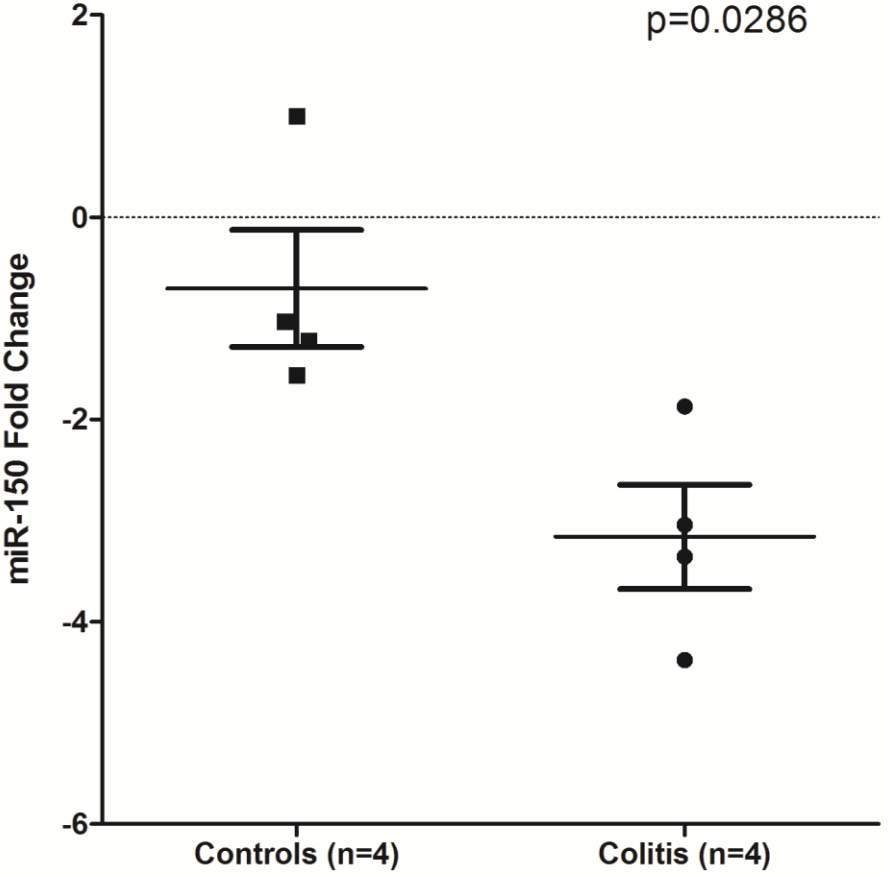

Supplemental Figure 2. Longitudinal expression of 12 miRNAs that showed statistically significant differential expression at 21 (miR-18a, -212, -363, -150 and -199a-5p) and 90 or 180DPI (miR-15b, -19b, -92a, -142-3p, -142-5p, -150, -181a, -199a-5p and -223) based on TLDA profiling.

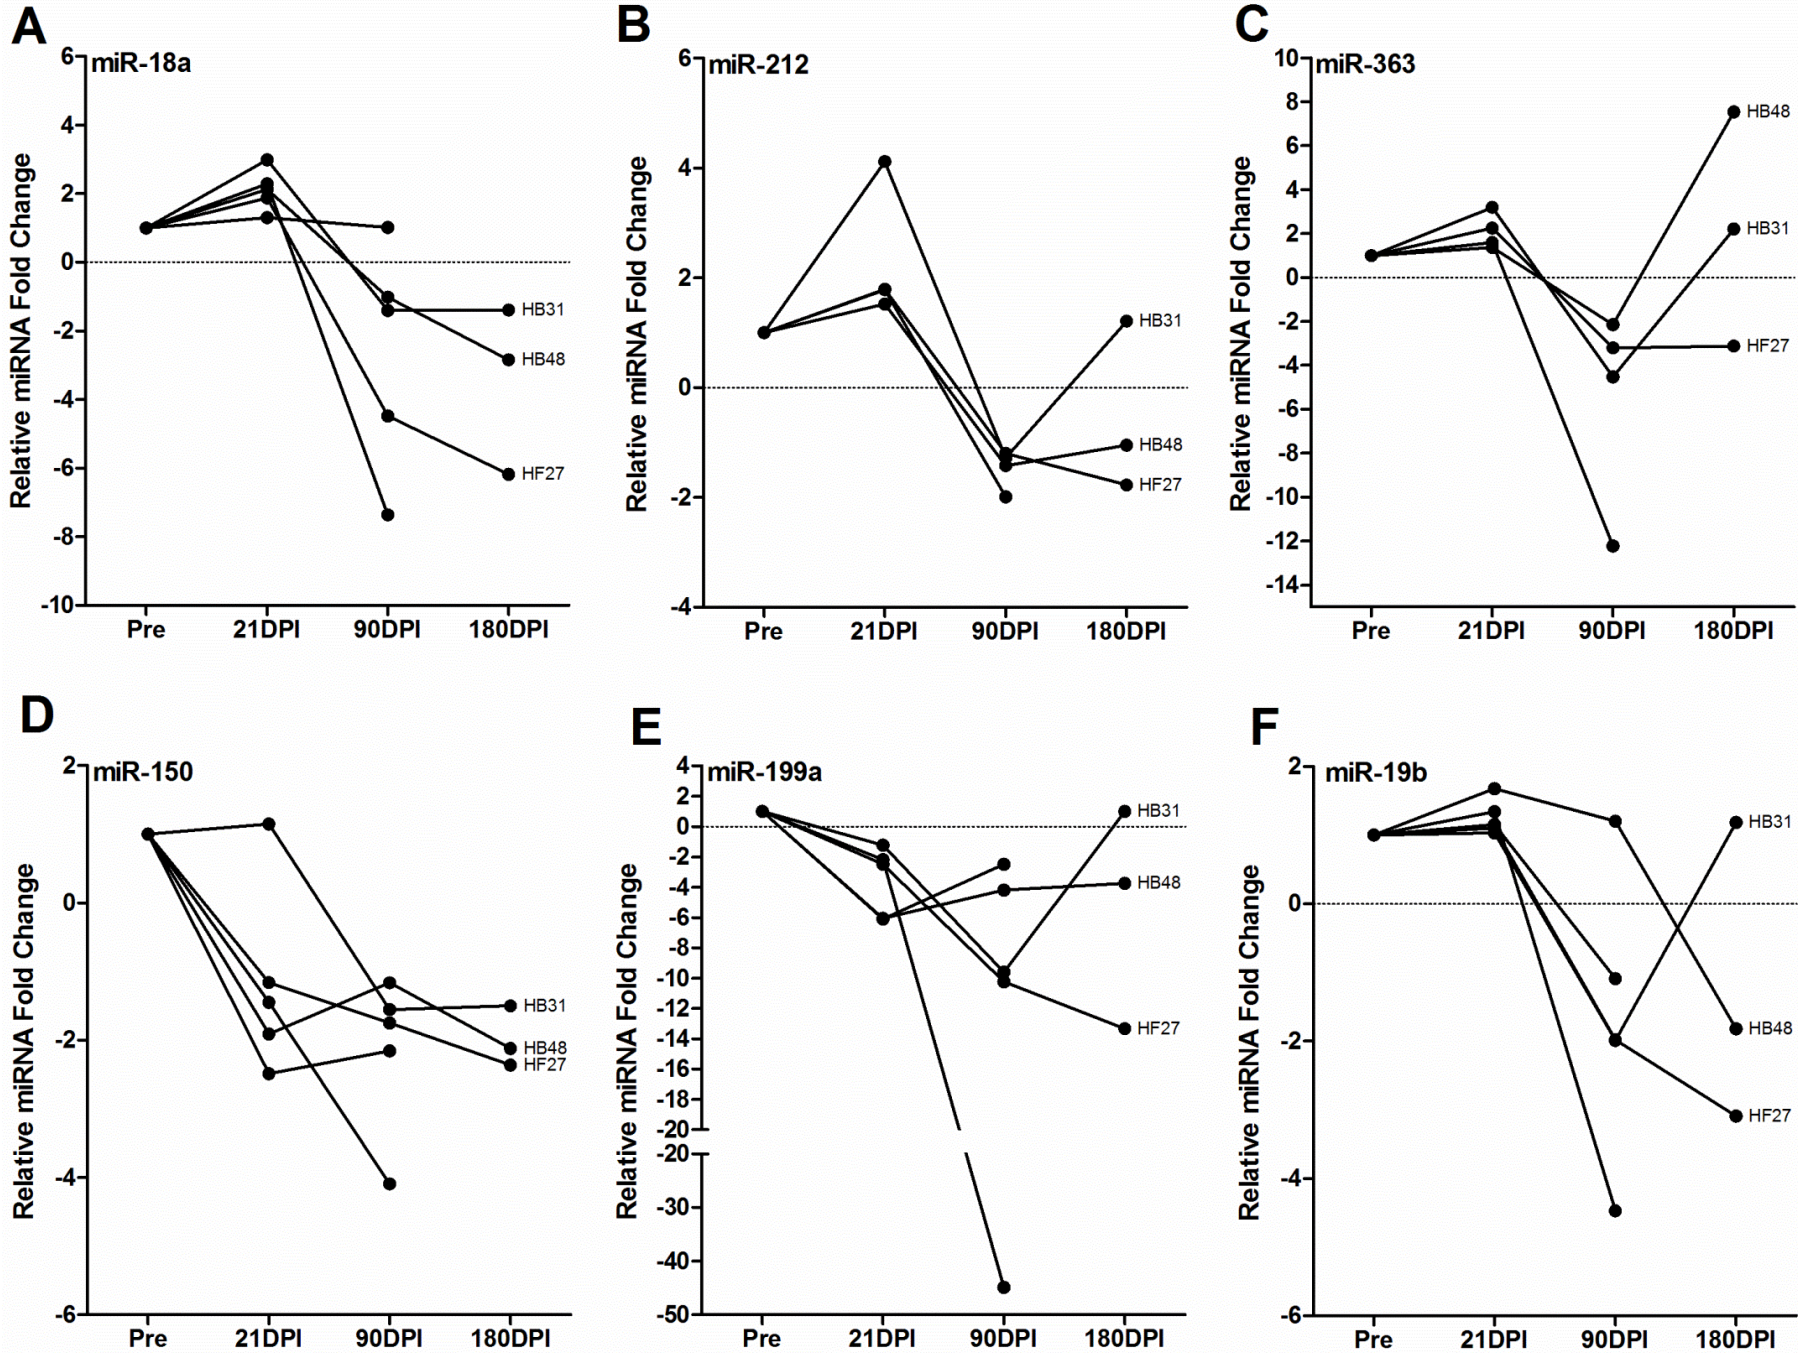

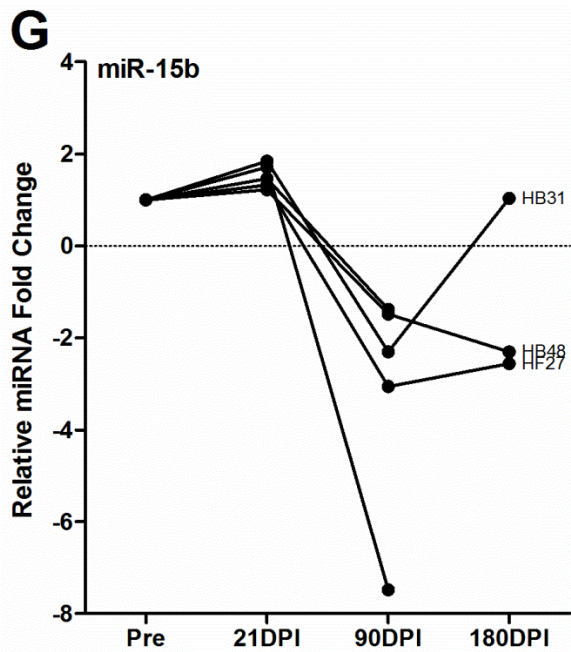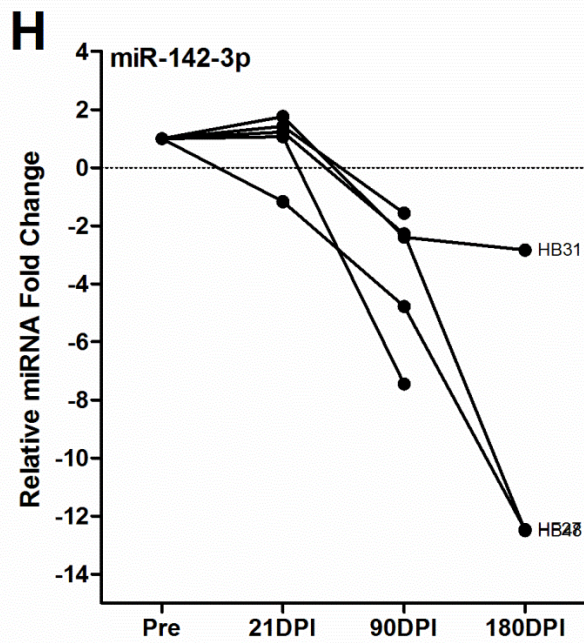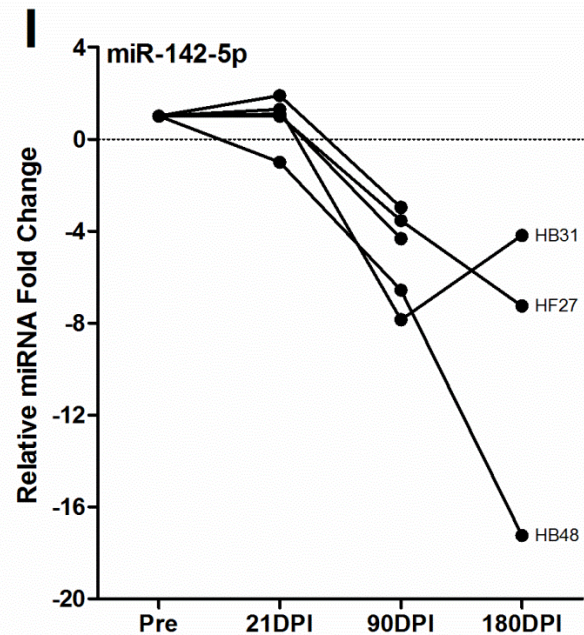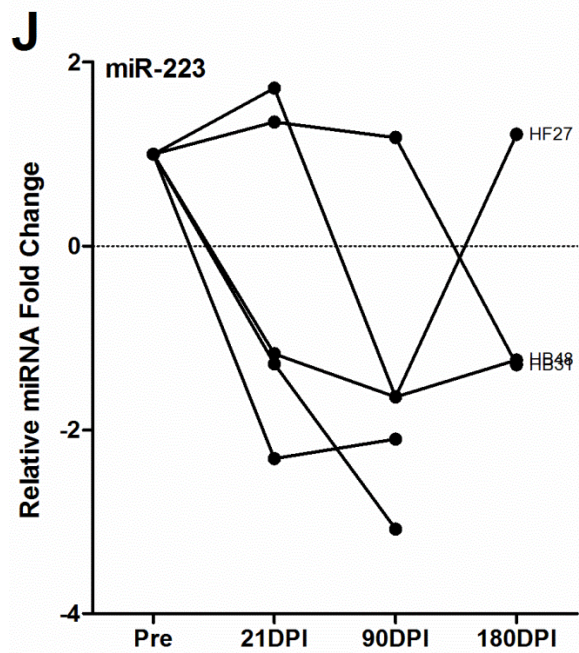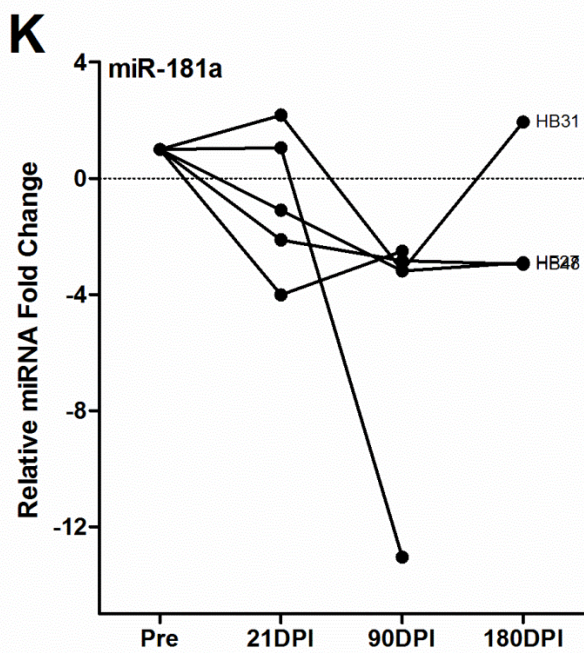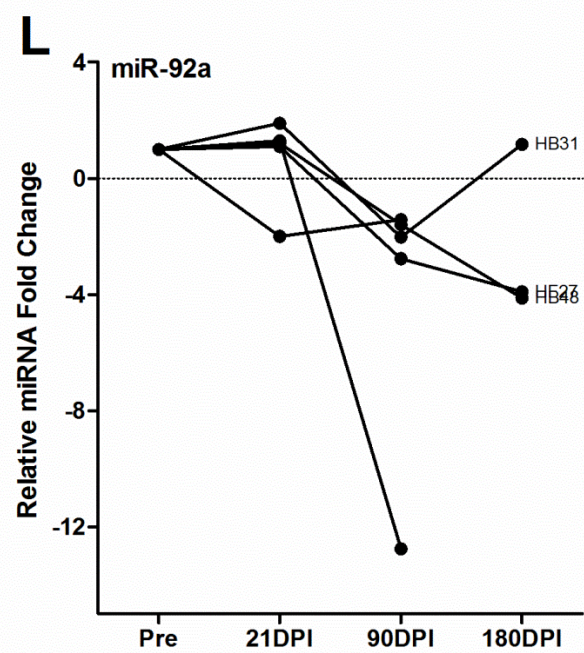



## REFERENCES

1. **Lewis BP, Burge CB, Bartel DP.** 2005. Conserved seed pairing, often flanked by adenosines, indicates that thousands of human genes are microRNA targets. *Cell* **120**:15–20. <http://dx.doi.org/10.1016/j.cell.2004.12.035>.
